# Supplementary material for: Epitomics: IgG-epitome decoding of E6, E7 and L1 proteins from oncogenic human papillomavirus type 58
Source: PubMed Central journal article supplement (PMC5052575; doi:10.1038/srep34686), 2016-10-06

# Epitomics: IgG-epitome decoding of E6, E7 and L1 proteins from oncogenic human papillomavirus type 58

Wan-Xiang Xu, Jian Wang, Hai-Ping Tang, Ya-Ping He, Qian-Xi Zhu, Satish K. Gupta, Shao-Hua Gu, Qiang

Huang, Chao-Neng Ji, Ling-Feng Liu, Gui-Ling Li, Cong-Jian Xu and Yi Xie

**Figure S1 Recombinant E6, E7, L1N and L1C proteins.** (A-D) SDS-PAGE analysis of expressed and purified E6, L1N (aa residues 36-234), L1C (aa residues 227-524), and E7; (E) Western blotting of expressed and purified E7 with mAb against His<sub>6</sub>-tag. Lanes 1, 6, 11, and 16, pre-stained protein markers; lanes 2, 7, 12, and 17/21, uninduced cell proteins; lanes 3, 8, 13, and 18/22 induced cell proteins; lanes 4, 9, 14, and 19/23, 2  $\mu$ g of purified E6, L1N, L1C, and E7 proteins; lanes 5, 10, 15, and 20, 2  $\mu$ g bovine serum albumin.

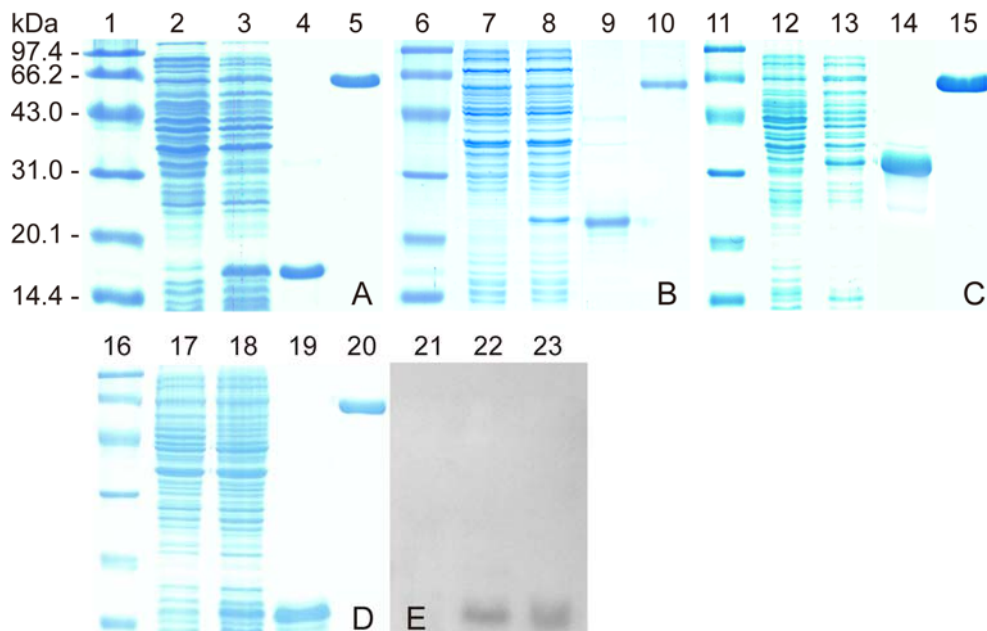

**Figure S2 Comparison of antibody titers to r-E6 (A), r-E7 (B), L1N (C) and L1C (D) in the group of immunized rabbits.** The antibody levels were determined by ELISA using the respective r-proteins as antigens. In each sub-panel, different colored lines represent (except blue line represents serum from rabbit immunized with adjuvant alone as negative control) individual immunized rabbits. Titers were determined based on the highest dilution of the sample that generated OD greater than 0.2.

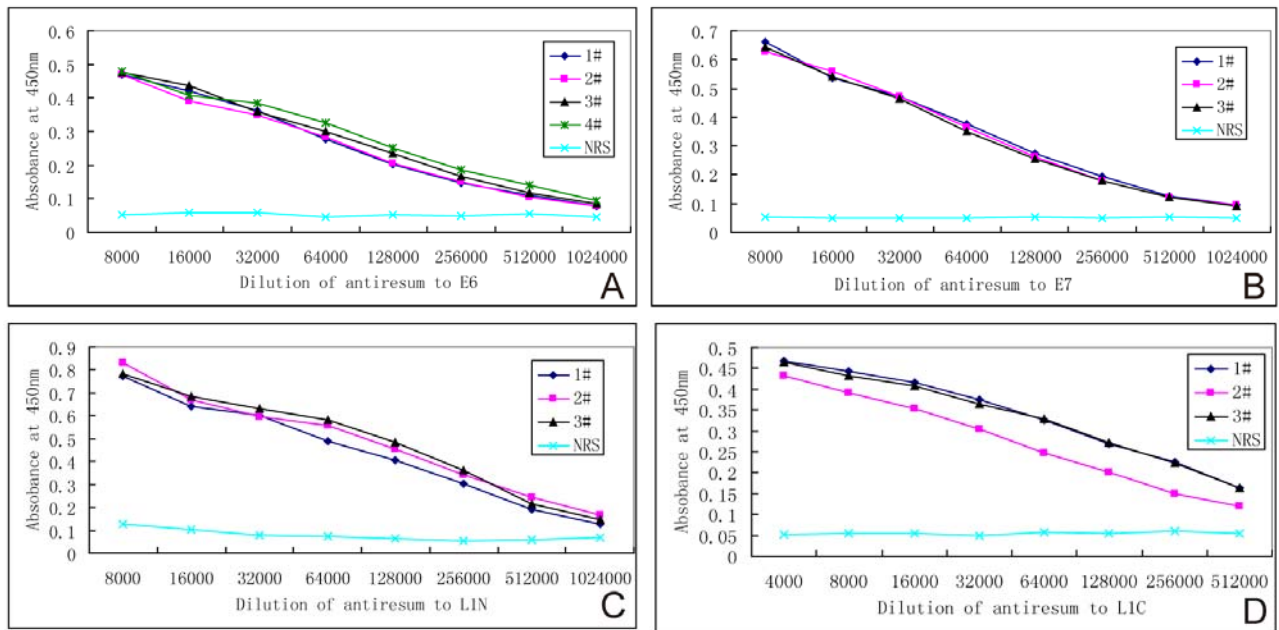

**Table S1 Analysis of the common sequence in reactive 6-8mer peptides for mapping BCEs of E7**

| Peptide NO. | Amino acid Sequence | position in HPV58 E7 | Peptide NO. | Amino acid sequence | position in HPV58 E7 |
|-------------|---------------------|----------------------|-------------|---------------------|----------------------|
| P16         | MRGNNPTL            | 1-8                  | P50         | DEIGLDGP            | 35-42                |
| P17         | RGNNPTLR            | 2-9                  | P51         | EIGLDGPD            | 36-43                |
| P18         | GNNPTLRE            | 3-10                 | P52         | IIGLDGPDG           | 37-44                |
| P19         | NNPTLREY            | 4-11                 | P53         | GLDGPDPGQ           | 38-45                |
| P20         | NPTLREYI            | 5-12                 | P54         | LDGPDGQA            | 39-46                |
| P21         | PTLREYIL            | 6-13                 | P55         | DGPDGQAQ            | 40-47                |
| P22         | TLREYILD            | 7-14                 | P56         | GPDGQAQP            | 41-48                |
| P23         | LREYILDL            | 8-15                 | P57         | PDGQAQPA            | 42-49                |
| P24         | REYILDLH            | 9-16                 | P58         | DGQAQPAT            | 43-50                |
| P25         | EYILDLHP            | 10-17                | P59         | GQAQPATA            | 44-51                |
| P26         | YILDLHPE            | 11-18                | P60         | MGTCTIVC            | 85-92                |
| P27         | ILDLHPEP            | 12-19                | P61         | GTCTIVCP            | 86-93                |
| P28         | LDLHPEPT            | 13-20                | P62         | TCTIVCPS            | 87-94                |
| P29         | DLHPEPTD            | 14-21                | P63         | CTIVCPSC            | 88-95                |
| P30         | LHPEPTDL            | 15-22                | P64         | TIVCPSCA            | 89-96                |
| P31         | HPEPTDLF            | 16-23                | P65         | IVCPSCAQ            | 90-97                |
| P32         | PEPTDLFC            | 17-24                | P66         | VCPSCAQQ            | 91-98                |
| P33         | EPTDLFCY            | 18-25                | P67         | CPSCAQQ             | 92-98                |
| P34         | PTDLFCYE            | 19-26                | P68         | PSCAQQ              | 93-98                |
| P35         | TDLFCYEQ            | 20-27                | P69         | A-SCAQQ             | 94-98                |
| P36         | DLFCYEQL            | 21-28                | P70         | AA-CAQQ             | 95-98                |
| P37         | LFCYEQLC            | 22-29                | P71         | AAA-AQQ             | 96-98                |
| P38         | FCYEQLCD            | 23-30                | P72         | AAA-DSSDED          | 30-35                |
| P39         | CYEQLCDS            | 24-31                | P73         | AAA-SSDED           | 31-35                |
| P40         | YEQLCDSS            | 25-32                | P74         | AAA-SDED            | 32-35                |
| P41         | EQLCDSSD            | 26-33                | P75         | AAA-DED             | 33-35                |
| P42         | QLCDSSDE            | 27-34                | P76         | AAA-EIG             | 36-38                |
| P43         | LCDSSDED            | 28-35                | P77         | AAA-EIGL            | 36-39                |
| P44         | CDSSDEDE            | 29-36                | P78         | AAA-EIGLD           | 36-40                |
| P45         | DSSDEDEI            | 30-37                | P79         | AA-EDEIGL           | 34-39                |
| P46         | SSDEDEIG            | 31-38                | P80         | A-DEDEIGL           | 33-39                |
| P47         | SDEDEIGL            | 32-39                | P47         | SDEDEIGL            | 32-39                |
| P48         | DEDEIGLD            | 33-40                | P81         | SDEDEIG-A           | 32-38                |
| P49         | EDEIGLDG            | 34-41                | P82         | SDEDEI-AA           | 32-37                |

The cyan highlight indicates minimal motif of each epitope (E7-1 to E7-9); the yellow indicates those of E7-5 and E7-6 mapped by 7 deduced fine epitope peptides; and the green indicates another E7-9 epitope mapped, which was not counted as an epitope in E7-epitome due to its position nested between conjoint sequences of E7-5 and E7-6.

**Table S2. Analysis of the common sequence in reactive 8mer peptides for mapping BCEs of L1**

| NO.  | Peptide sequence | Range   | NO.  | Peptide sequence | Range   |
|------|------------------|---------|------|------------------|---------|
| P61  | MTVYLPPV         | 35-42   | P101 | NRYPAPQG         | 160-167 |
| P62  | TVYLPPVP         | 36-43   | P102 | RYPAQPGS         | 161-168 |
| P63  | VYLPPVPV         | 37-44   | P103 | YPAQPGSD         | 162-169 |
| P64  | YLPPVPVS         | 38-45   | P104 | PAQPGSDN         | 163-170 |
| P65  | LPPVPVSK         | 39-46   | P105 | AQPGSDNR         | 164-171 |
| P66  | PPVPVSKV         | 40-47   | P106 | QPGSDNRE         | 165-172 |
| P67  | PVPVSKVV         | 41-48   | P107 | NNNAAATD         | 203-210 |
| P68  | VPVSKVVS         | 42-49   | P108 | NNAAATDC         | 204-211 |
| P69  | PVSKVVST         | 43-50   | P109 | NAAATDCP         | 205-212 |
| P70  | VSKVVSTD         | 44-51   | P110 | AAATDCPP         | 206-213 |
| P71  | SKVVSTDE         | 45-52   | P111 | AATDCPPL         | 207-214 |
| P72  | VFRVRLPD         | 99-106  | P112 | ATDCPPLE         | 208-215 |
| P73  | FRVRLPDP         | 100-107 | P113 | TDCPPLEL         | 209-216 |
| P74  | RVRLPDPN         | 101-108 | P114 | DCPPLELF         | 210-217 |
| P75  | VRLPDPNK         | 102-109 | P115 | CPPLELFN         | 211-217 |
| P76  | RLPDPNKF         | 103-110 | P116 | PPELEFNS         | 212-218 |
| P77  | LPDPNKFG         | 104-111 | P117 | PLELEFNSI        | 213-219 |
| P78  | DPNKFGF          | 105-112 | P118 | LELEFNSII        | 214-220 |
| P79  | DPNKFGFP         | 106-113 | P119 | SIIEDGDM         | 219-226 |
| P80  | PNKFGFPD         | 107-114 | P120 | IIEDGDMV         | 220-227 |
| P81  | NKFGFPDT         | 108-115 | P121 | IEDGDMVD         | 221-228 |
| P82  | KFGFPDTS         | 109-116 | P122 | EDGDMVDT         | 222-229 |
| P83  | VGVSGHPY         | 142-149 | P123 | DGDMVDTG         | 223-230 |
| P84  | GVSHPYLN         | 143-150 | P124 | GDMVDTGF         | 224-231 |
| P85  | VSGHPYLN         | 144-151 | P125 | DMVDTGFG         | 225-232 |
| P86  | SGHPYLNK         | 145-152 | P126 | MVDTGFGC         | 226-233 |
| P87  | GHPYLNKF         | 146-153 | P127 | VDTGFGCM         | 227-234 |
| P88  | HPYLNKFD         | 147-154 | P128 | DTGFGCMD         | 228-235 |
| P89  | PYLNKFDD         | 148-155 | P129 | TGFGCMDF         | 229-236 |
| P90  | YLNKFDDT         | 149-156 | P130 | GFGCMDFG         | 230-237 |
| P91  | LNKFDDTE         | 150-157 | P131 | FGCMDFGT         | 231-238 |
| P92  | NKFDDTET         | 151-158 | P132 | GCMDFGTL         | 232-239 |
| P93  | KFDDTETS         | 152-159 | P133 | CMDFGTLQ         | 233-240 |
| P94  | FDDTETSN         | 153-160 | P134 | MDFGTLQA         | 234-241 |
| P95  | DDTETSNR         | 154-161 | P135 | DFGTLQAN         | 235-242 |
| P96  | DTETSNRYP        | 155-162 | P136 | FGTLQANK         | 236-243 |
| P97  | TETSNRYP         | 156-163 | P137 | GTLQANKS         | 237-244 |
| P98  | ETSNRYP          | 157-164 | P138 | TLQANKSD         | 238-245 |
| P99  | TSNRYP           | 158-165 | P139 | LQANKSDV         | 239-246 |
| P100 | SNRYP            | 159-166 | P140 | QANKSDVP         | 240-247 |

|      |           |         |      |           |         |
|------|-----------|---------|------|-----------|---------|
| P141 | ANKSDVPI  | 241-248 | P182 | EGTYKNDN  | 377-384 |
| P142 | NKSDVPIID | 242-249 | P183 | GTYNKDNDF | 378-385 |
| P143 | KSDVPIIDI | 243-250 | P184 | TYKNDNFK  | 379-386 |
| P144 | SDVPIIDIC | 244-251 | P185 | YKNDNFKE  | 380-387 |
| P145 | DVPIIDICN | 245-252 | P186 | KNDNFKEY  | 381-388 |
| P146 | VPIDICNS  | 246-253 | P187 | NDNFKEYV  | 382-389 |
| P147 | PIDICNST  | 247-254 | P188 | DNFKEYVR  | 383-390 |
| P148 | IDICNSTC  | 248-255 | P189 | NFKEYVRH  | 384-391 |
| P149 | DICNSTCK  | 249-256 | P190 | FKEYVRHV  | 385-392 |
| P150 | ICNSTCKY  | 250-257 | P191 | KEYVRHVE  | 386-393 |
| P151 | CNSTCKYP  | 251-258 | P192 | EYVRHVEE  | 387-394 |
| P152 | NSTCKYPD  | 252-259 | P193 | YVRHVEEY  | 388-395 |
| P153 | AGKLGEAV  | 290-297 | P194 | AITCQKTA  | 450-457 |
| P154 | GKLGEAVP  | 291-298 | P195 | ITCQKTAP  | 451-458 |
| P155 | KLGEAVPD  | 292-299 | P196 | TCQKTAPP  | 452-459 |
| P156 | LGEAVPDD  | 293-300 | P197 | CQKTAPPK  | 453-460 |
| P157 | GEAVPDDL  | 294-301 | P198 | QKTAPPKE  | 454-461 |
| P158 | EAVPDDLY  | 295-302 | P199 | KTAPPKEK  | 455-462 |
| P159 | AVPDDLYI  | 296-303 | P200 | TAPPKEKE  | 456-463 |
| P160 | VPDDLYIK  | 297-304 | P201 | APPKEKED  | 457-464 |
| P161 | PDDLYIKG  | 298-305 | P202 | PPKEKEDP  | 458-465 |
| P162 | DDLYIKGS  | 299-306 | P203 | PKEKEDPL  | 459-466 |
| P163 | DLYIKGSG  | 300-307 | P204 | KEKEDPLN  | 460-467 |
| P164 | SGSIVTSE  | 322-329 | P205 | EKEDPLNK  | 461-468 |
| P165 | GSIVTSES  | 323-330 | P206 | KEDPLNKY  | 462-469 |
| P166 | SIVTSESQ  | 324-331 | P207 | EDPLNKYT  | 463-470 |
| P167 | IVTSESQI  | 325-332 | P208 | DPLNKYTF  | 464-471 |
| P168 | VTSESQIF  | 326-333 | P209 | PLNKYTFW  | 465-472 |
| P169 | TSESQIFN  | 327-334 | P210 | GLKAKPRL  | 498-505 |
| P170 | SESQIFNK  | 328-335 | P211 | LKAKPRLK  | 499-506 |
| P171 | ESQIFNKP  | 329-336 | P212 | KAKPRLKR  | 500-507 |
| P172 | SQIFNKPY  | 330-337 | P213 | AKPRLKRS  | 501-508 |
| P173 | QLFNKPYW  | 331-338 | P214 | KPRLKRSA  | 502-509 |
| P174 | LFNKPYWL  | 332-339 | P215 | PRLKRSAP  | 503-510 |
| P175 | LCTEVTKE  | 370-377 | P216 | RLKRSAPT  | 504-511 |
| P176 | CTEVTKEG  | 371-378 | P217 | LKRSAPTT  | 505-512 |
| P177 | TEVTKEGT  | 372-379 | P218 | KRSAPTRR  | 506-513 |
| P178 | EVTKEGTY  | 373-380 | P219 | RSAPTTTRA | 507-514 |
| P179 | VTKEGTYK  | 374-381 | P220 | SAPTTTRAP | 508-515 |
| P180 | TKEGTYKN  | 375-382 | P221 | APTTRAPS  | 509-516 |
| P181 | KEGTYKND  | 376-383 |      |           |         |

The cyan highlight indicates minimal motif of each epitope (L1-1 to L1-18).

**Table S3. Conservative analysis of HPV58-BCE motifs among LR-HPVs and other unknown LR-/HR-HPVs**

| HPV58<br>BCE No. | HPV types and aligning sequence (aa range) |         |         |         |         |         |         |         |         |         |         |         |         |         |         |         |         |         |         |
|------------------|--------------------------------------------|---------|---------|---------|---------|---------|---------|---------|---------|---------|---------|---------|---------|---------|---------|---------|---------|---------|---------|
|                  | 6*                                         | 11*     | 40*     | 42*     | 43*     | 44*     | 30      | 34      | 54      | 61      | 62      | 67      | 69      | 70      | 72      | 81      | 85      | 89      | 91      |
| E6-2             |                                            |         |         |         |         |         |         | 85-89   |         |         |         | 84-88   | 84-88   |         |         |         | 86-90   |         |         |
| E6-3             |                                            |         |         |         |         |         |         | 123-127 |         |         |         |         |         |         |         |         |         |         |         |
| E7-2             | 12-15                                      | 12-15   |         |         |         |         |         | 12-15   | 12-15   |         |         | 12-15   | 12-15   | 12-15   |         |         |         | 12-15   |         |
| L1-2             |                                            |         |         |         | 78-83   |         |         | 105-110 |         |         |         | 110-115 |         |         |         |         |         |         | 170-175 |
| L1-3             |                                            |         |         |         | 117-122 |         |         |         |         |         |         |         |         |         |         |         |         |         | 209-214 |
| L1-4             |                                            |         |         | 153-156 | 125-128 |         | 134-137 |         | 124-127 | 129-132 | 127-130 | 157-160 | 125-128 | 127-130 | 128-131 | 128-131 | 127-130 | 144-147 |         |
| L1-7             | 183-187                                    | 184-188 |         | 211-215 |         | 184-188 | 194-198 | 210-214 | 183-187 |         |         | 217-221 | 187-191 | 185-189 |         |         |         | 187-191 |         |
| L1-8             |                                            |         |         |         |         | 193-198 |         |         |         |         |         |         |         |         |         |         |         | 212-217 | 286-291 |
| L1-9             | 198-201                                    |         | 200-203 |         | 200-203 | 199-202 |         |         |         |         |         | 232-235 | 202-205 |         |         |         |         |         | 292-295 |
| L1-11            |                                            |         |         |         |         |         |         | 242-246 |         |         |         |         |         |         |         |         |         |         |         |
| L1-12            |                                            | 269-272 |         |         |         |         |         | 295-298 |         |         |         |         |         |         |         |         |         |         |         |
| L1-13            | 301-305                                    | 316-320 |         | 332-336 | 303-307 | 301-305 | 312-316 |         |         | 306-310 | 306-310 | 335-339 | 306-310 | 303-307 | 307-311 | 307-311 |         | 323-327 | 395-399 |
| L1-16            |                                            |         |         |         |         |         | 443-446 |         | 431-433 |         |         | 466-469 | 439-442 |         | 440-443 | 439-442 |         |         | 528-531 |
| L1-18            |                                            |         |         |         | 492-494 |         | 492-494 | 511-513 |         |         | 487-489 |         |         |         |         |         |         |         | 583-585 |

Asterisk indicates the widely accepted typical LR-HPV types. Other unknown or contentious HR- or LR-HPVs are from refs. 33, 34, and 59-61.

**Table S4. Analysis of mutations of amino acids related with E6-2 in HPV16, 18 and 52 variants**

| HPV Types                      | Countries/Regions              | Refs. | Mutation of amino acids and their position |       |       |       |       |       |       |       | D/X mutation /variant numbers |
|--------------------------------|--------------------------------|-------|--------------------------------------------|-------|-------|-------|-------|-------|-------|-------|-------------------------------|
| 16                             | Worldwide                      | 62    | K11Q                                       | L12V  | H24Y  | D25N  | E30Q  | A61G  | R77K  |       | 0/45                          |
|                                | Sweden                         | 63    | Q3E                                        | R10G  | K11T  | Q14H  | D25N  | I27R  | N29S  | H51N  | 0/14                          |
|                                |                                |       | R55K                                       | N58S  | A61G  | H78Y  | L83V  |       |       |       |                               |
|                                | Italy                          | 64    | Q14H                                       | Q20H  | E29G  | K34Q  | K65T  | K72N  | H78Y  | L83V  | 0/16                          |
|                                |                                |       | F125C                                      | N127H | G134D | C136R | C140S | S142P |       |       |                               |
|                                | Northeast, China               | 65    | D25N                                       | D25E  | N58S  | C80G  | L83V  | E113D |       |       | 0/30                          |
|                                | Liaoning, China                | 66    | R10G                                       | D25E  | H78Y  | L83V  | E113D |       |       |       | 0/199                         |
| Taiwan                         | 67                             | R10G  | K11Q                                       | K11T  | L12V  | Q14H  | D25Q  | D25E  | I27R  | 0/152 |                               |
|                                |                                | L38P  | I52M                                       | N58S  | N58K  | H78Y  | L83V  | E113D |       |       |                               |
| Japan, Philippines and Vietnam | 50                             | R10I  | Q14D                                       | D25E  | R48W  | I52V  | H78Y  | L83V  | E113D | 0/62  |                               |
| 18                             | Indonesia                      | 68    | C105W                                      | N129K |       |       |       |       |       | 0/4   |                               |
|                                | Portugal                       | 69    | H80Y                                       | N129K |       |       |       |       |       | 0/16  |                               |
|                                | Mexico                         | 70    | H80Y                                       | N129K |       |       |       |       |       | 0/2   |                               |
|                                | Northeast, China               | 71    | H131N                                      |       |       |       |       |       |       | 0/2   |                               |
| 52                             | Japan                          | 37    | K93R                                       |       |       |       |       |       |       | 0/45  |                               |
|                                | Taiwan                         | 39    | K34R                                       | K93G  | K93R  | S97R  | E116K | N122K |       | 0/235 |                               |
|                                | Northeast, China               | 72    | K93R                                       |       |       |       |       |       |       | 0/65  |                               |
|                                | Japan, Philippines and Vietnam | 50    | H24D                                       | K93R  | K93G  | N122K |       |       |       | 0/85  |                               |

**Supplementary references**

59. Hwang, T. S. *et al.* Detection and typing of HPV genotypes in various cervical lesions by HPV oligonucleotide microarray. *Gynecol Oncol.* **90**, 51-56 (2003).
60. Dockter, J. *et al.* Clinical performance of the APTIMA HPV Assay for the detection of high-risk HPV and high-grade cervical lesions. *J Clin Virol.* **45** (Suppl 1), S55-61 (2009).
61. Chen, Z. *et al.* Evolution and taxonomic classification of alphapapillomavirus 7 complete genomes: HPV18, HPV39, HPV45, HPV59, HPV68 and HPV70. *PLoS One.* **8**, e72565 (2013).
62. Yamada, T. *et al.* Human papillomavirus type 16 sequence variation in cervical cancers: a worldwide perspective. *J Virol.* **71**, 2463-2472 (1997).
63. Zehbe, I. Wilander, E., Delius, H. & Tommasino, M. Human papillomavirus 16 E6 variants are more prevalent in invasive cervical carcinoma than the prototype. *Cancer Res.* **58**, 829-833 (1998).

64. Cento, V., Ciccozzi, M., Ronga, L., Perno, C. F. & Ciotti, M. Genetic diversity of human papillomavirus type 16 E6, E7 and L1 genes in Italian women with different grades of cervical lesions. *J Med Virol.* **81**, 1627-1634 (2009).
65. Shang, Q. *et al.* Human papillomavirus type 16 variant analysis of E6, E7, and L1 [corrected] genes and long control region in [corrected] cervical carcinomas in patients in northeast China. *J Clin Microbiol.* **49**, 2656-2663 (2011).
66. Sun, Z. *et al.* Genetic variations of E6 and long control region of human papillomavirus type 16 from patients with cervical lesion in Liaoning, China. *BMC Cancer.* **13**, 459 (2013).
67. Chang, Y. J. *et al.* Intratypic variants of human papillomavirus type 16 and risk of cervical neoplasia in Taiwan. *J Med Virol.* **85**, 1567-1576 (2013).
68. De Boer, M. A. *et al.* 2005. Human papillomavirus type 18 variants: histopathology and E6/E7 polymorphisms in three countries. *Int J Cancer.* **114**, 422-425 (2005).
69. De la Cruz-Hernández, E. *et al.* 2005. Differential splicing of E6 within human papillomavirus type 18 variants and functional consequences. *J Gen Virol.* **86**(Pt 9), 2459-68 (2005).
70. Pista, A. *et al.* 2007. Molecular variants of human papillomavirus type 16 and 18 and risk for cervical neoplasia in Portugal. *J Med Virol.* **79**, 1889-1897 (2007).
71. Sun, Z. *et al.* Variant lineages of human papillomavirus type 18 in Northeast China populations characterized by sequence analysis of E6, E7, and L1 regions. *Int J Gynecol Cancer.* **22**, 930-936 (2012).
72. Sun, Z. *et al.* Genomic polymorphism of human papillomavirus type 52 in women from Northeast China. *Int J Mol Sci.* **13**, 14962-14972 (2012).



The full length figures of SDS-PAGE gels and blots:

Figure S3 for Figure 1

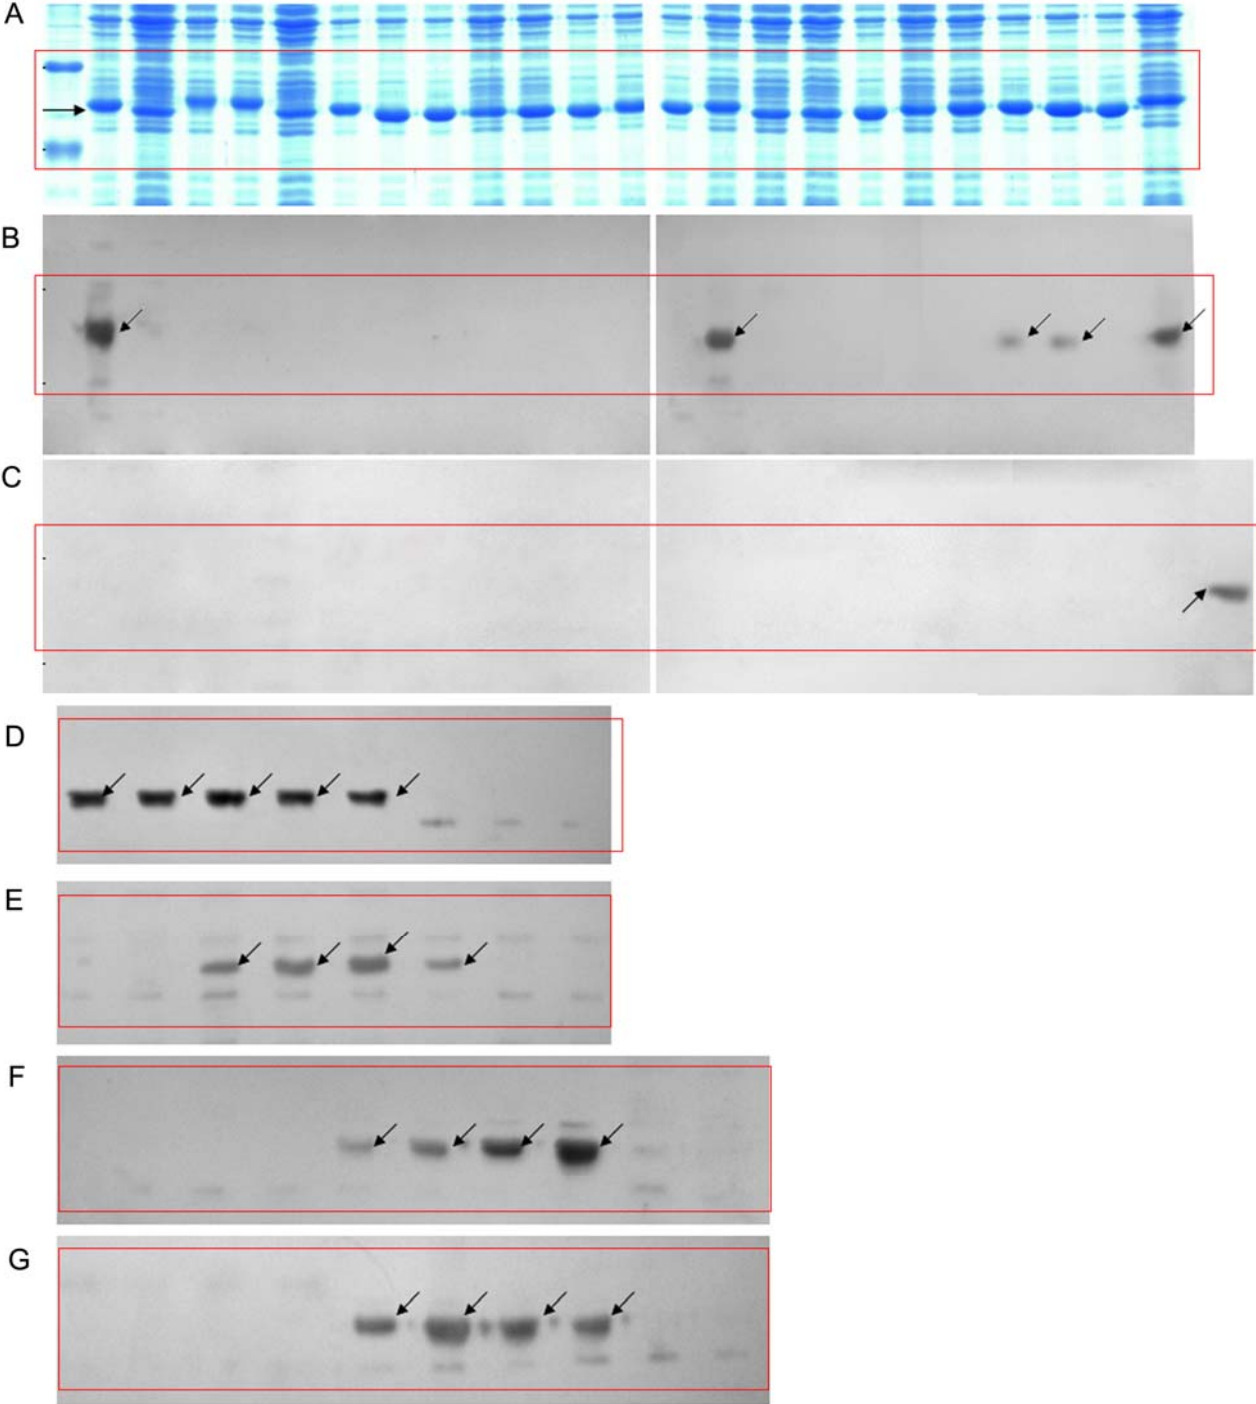

Figure S4 for Figure 2

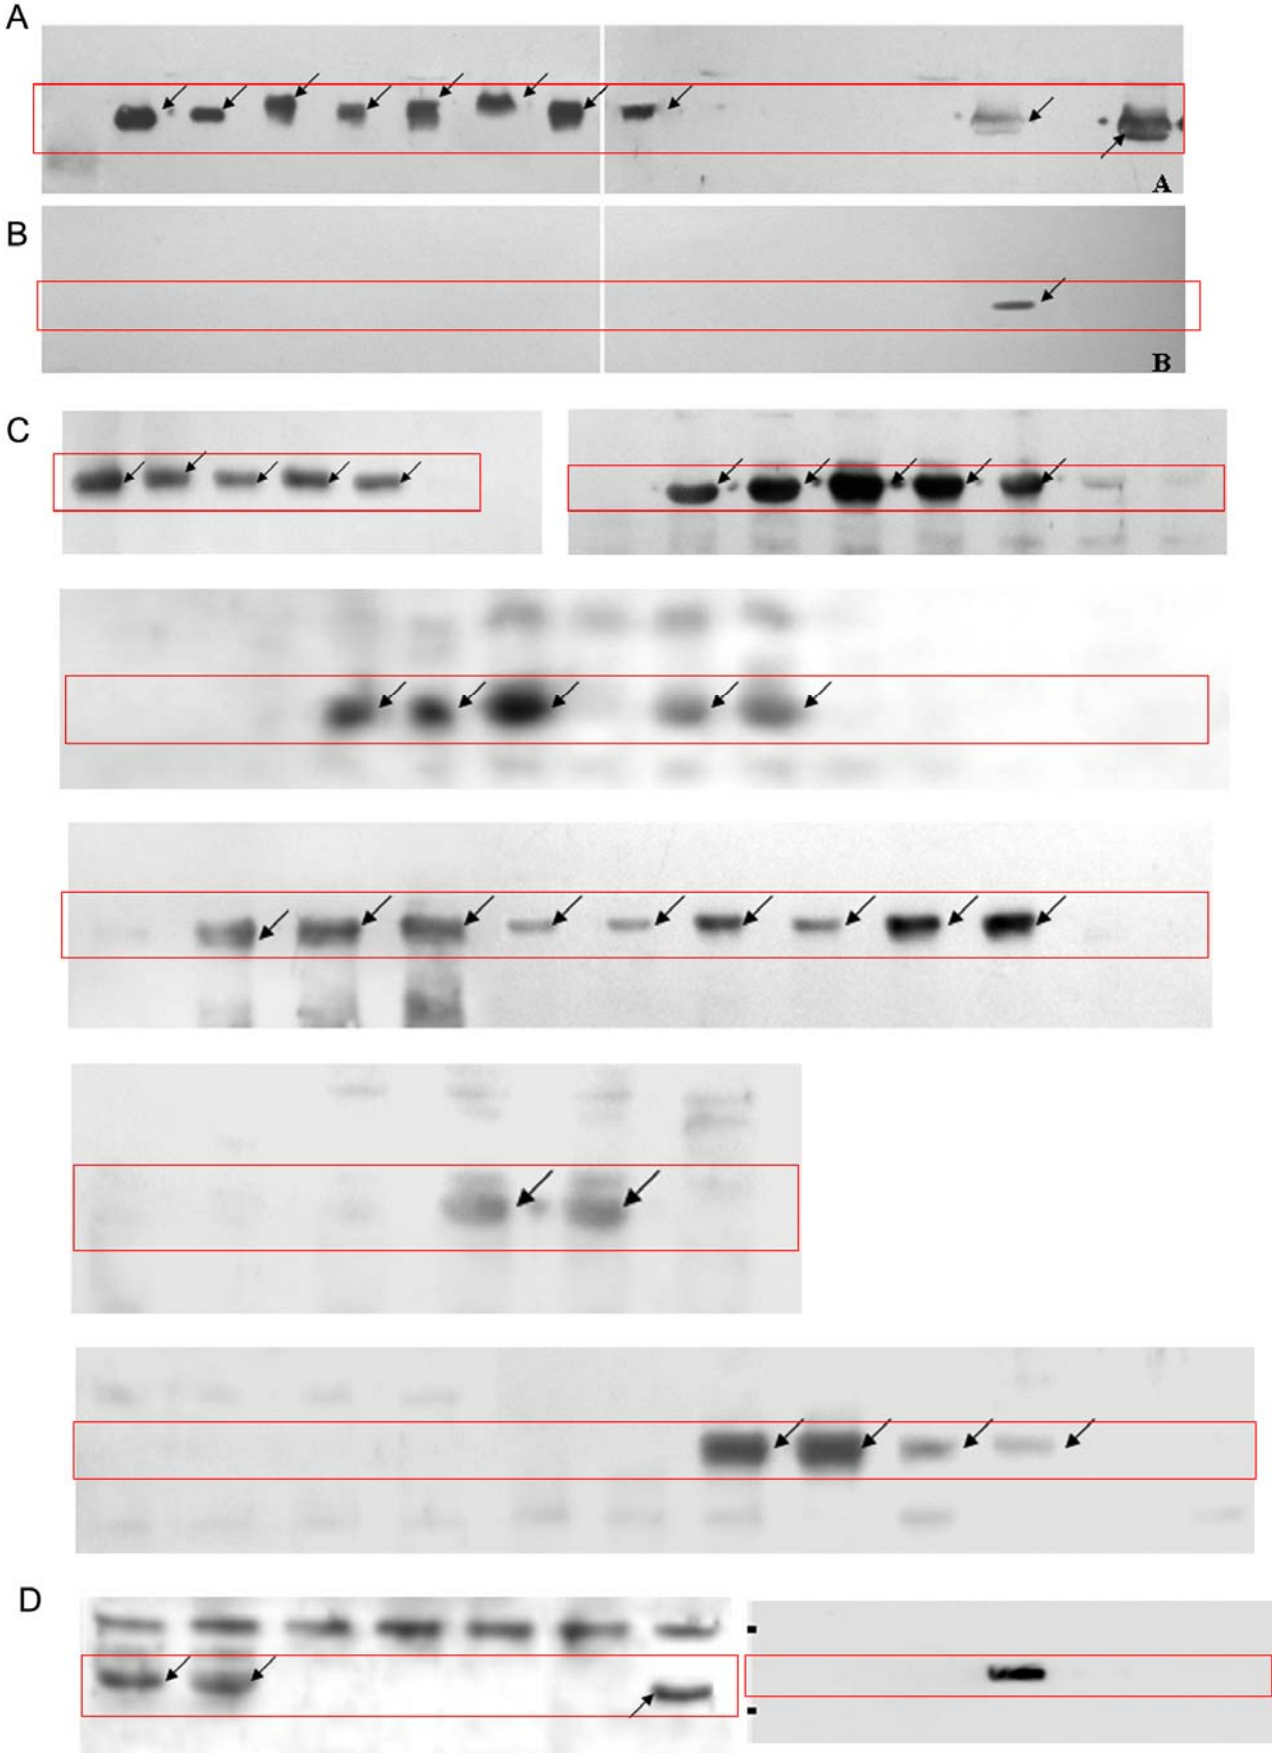

Figure S5 for Figure 3

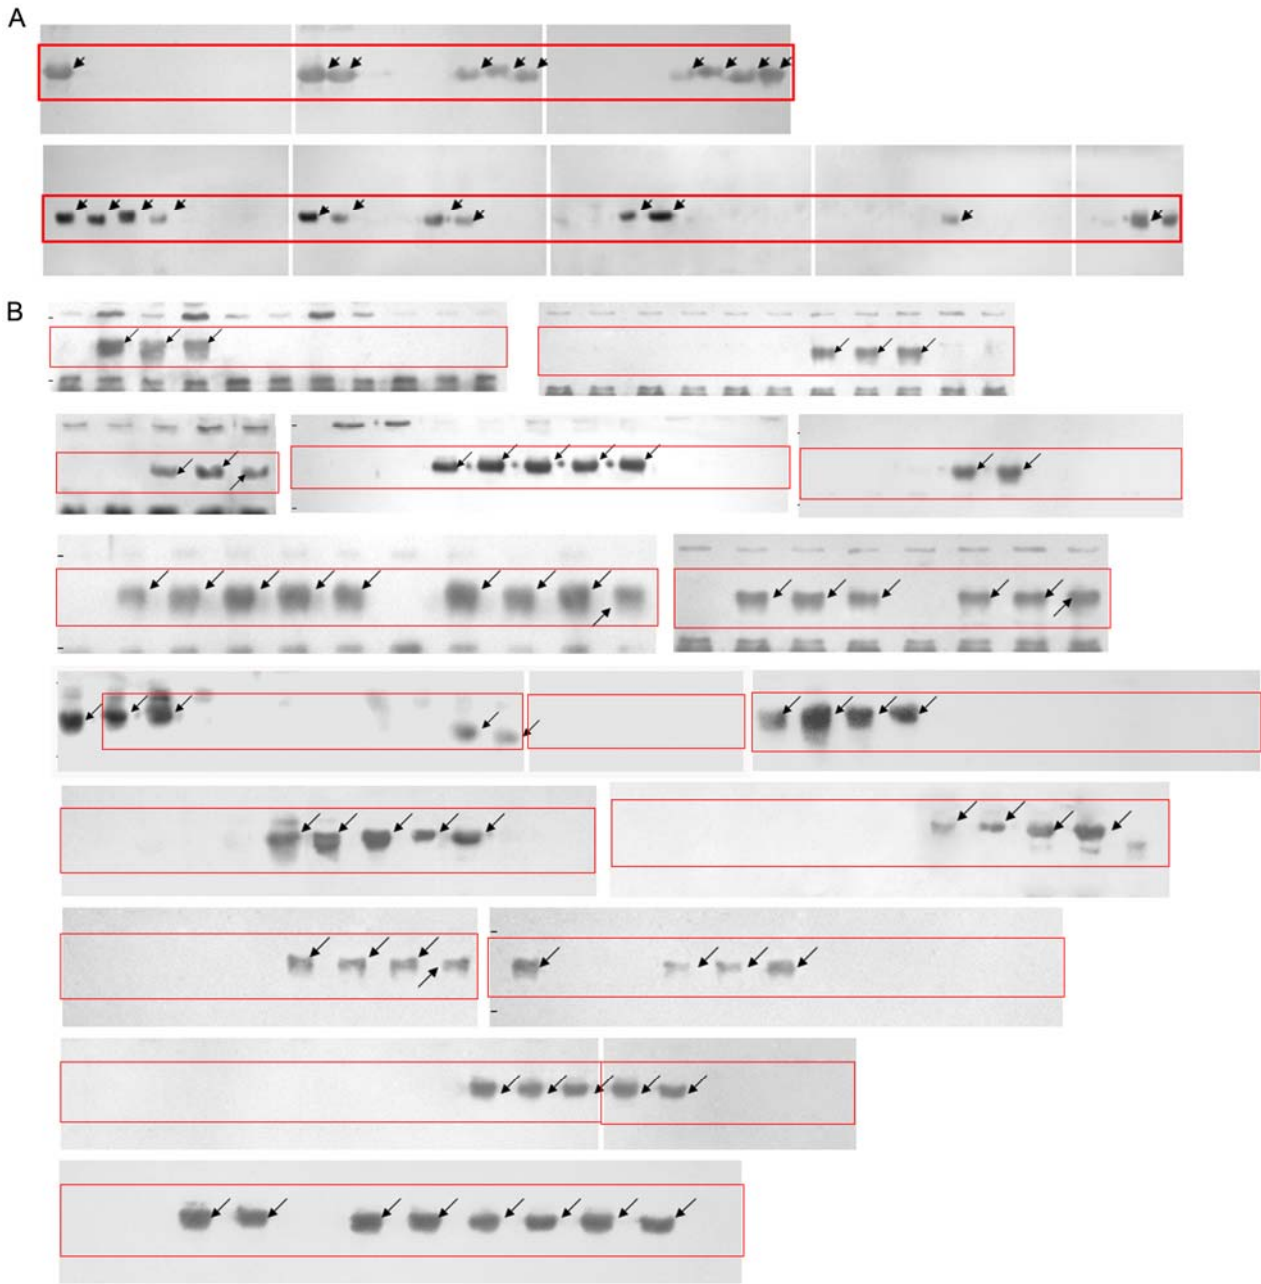

Figure S6 for Figure 4

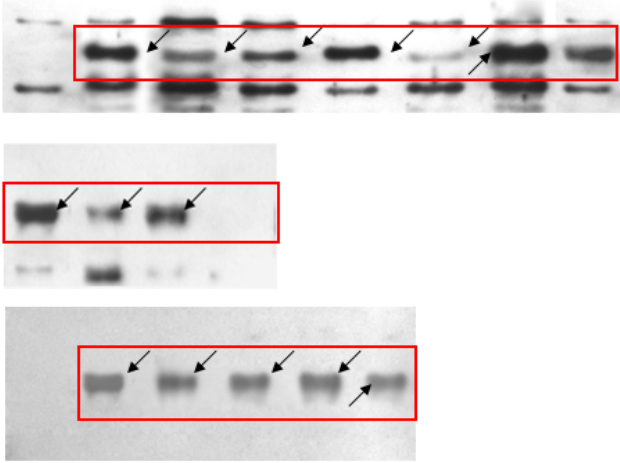

Figure S7 for Figure 5

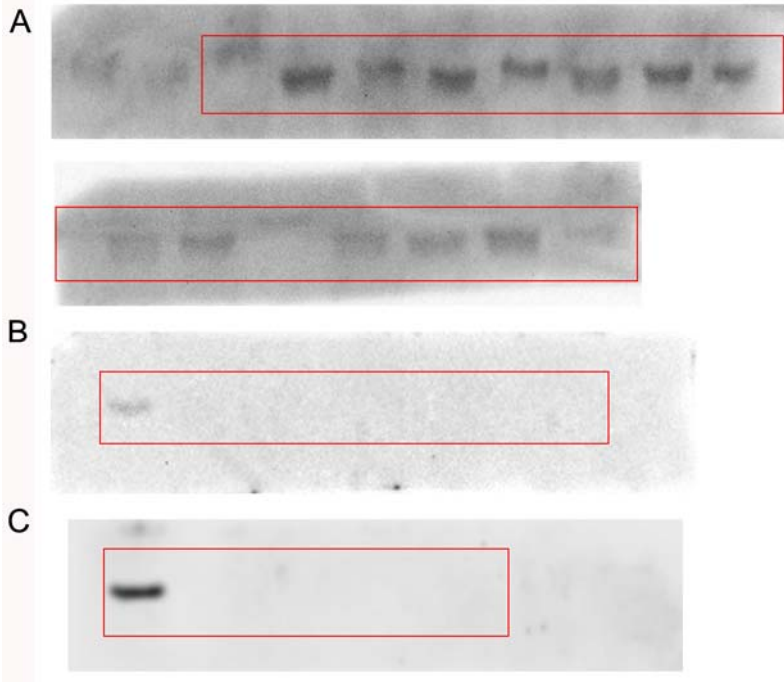

Supplement: srep34686-s1.pdf [file srep34686-s1.pdf]
